# Supplementary material for: Synthesis of highly emissive 1,8-diaryl anthracene derivatives and fabrication of their micro/nanostructures
Source: Royal Society of Chemistry journal article supplement (doi:10.1039/c5ra19564k), 2015-01-01
Supplement: c5ra19564k1.pdf [file c5ra19564k1.pdf]

## Supporting information

### Synthesis of Highly Emissive 1,8-diaryl Anthracene Derivatives and Fabrication of their Micro/nanostructures

Neeraj Agarwal\*, Manish Patil and Mahendra Patil

UM-DAE, Centre for Excellence in Basic Sciences, University of Mumbai, Kalina  
campus, Santacruz (E), Mumbai 400098, India

Email: na@cbs.ac.in

---

**Figure SI 1:**  $^1\text{H-NMR}$  of **7** in  $\text{CDCl}_3$ .

**Figure SI 2:**  $^1\text{H-NMR}$  (top) and  $^{13}\text{C-NMR}$  (bottom) of **1** in  $\text{CDCl}_3$ .

**Figure SI 3:**  $^1\text{H-NMR}$  (top) and  $^{13}\text{C-NMR}$  (bottom) of **2** in  $\text{CDCl}_3$ .

**Figure SI 4:**  $^1\text{H-NMR}$  of **3** in  $\text{CDCl}_3$ .

**Figure SI 5:**  $^1\text{H-NMR}$  of **4** in  $\text{CDCl}_3$ .

**Figure SI 6:**  $^1\text{H-NMR}$  (top) and  $^{13}\text{C-NMR}$  (bottom) of **5** in  $\text{CDCl}_3$ .

**Figure SI 7:**  $^1\text{H-NMR}$  (top) and  $^{13}\text{C-NMR}$  (bottom) of **6** in  $\text{CDCl}_3$ .

**Figure SI 8:** Absorption spectra of drop casted thin films of **1-6**

**Figure SI 9:** Cyclic voltammograms and Differential pulse voltammograms of **1-6** (except **3**) in acetonitrile.

**Figure SI 10:** MALDI-TOF mass spectrum of compound **1**

**Figure SI 11:** MALDI-TOF mass spectrum of compound **2**

**Figure SI 12:** MALDI-TOF mass spectrum of compound **3**

**Figure SI 13:** MALDI-TOF mass spectrum of compound **4**

**Figure SI 14:** MALDI-TOF mass spectrum of compound **5**

**Figure SI 15:** MALDI-TOF mass spectrum of compound **6**

**Figure SI 16:** Fluorescence decay spectra of **1-6**.

**Table SI 1.** The optimized geometries (Cartesian coordinates in Å) and energies (a.u.) of dimers of **1** and **5** computed at the B3LYP/6-311G\*\* level of theory. (Eg = Total electronic energy, THc = Thermal correction to Gibbs Free energy computed at the B3LYP level).

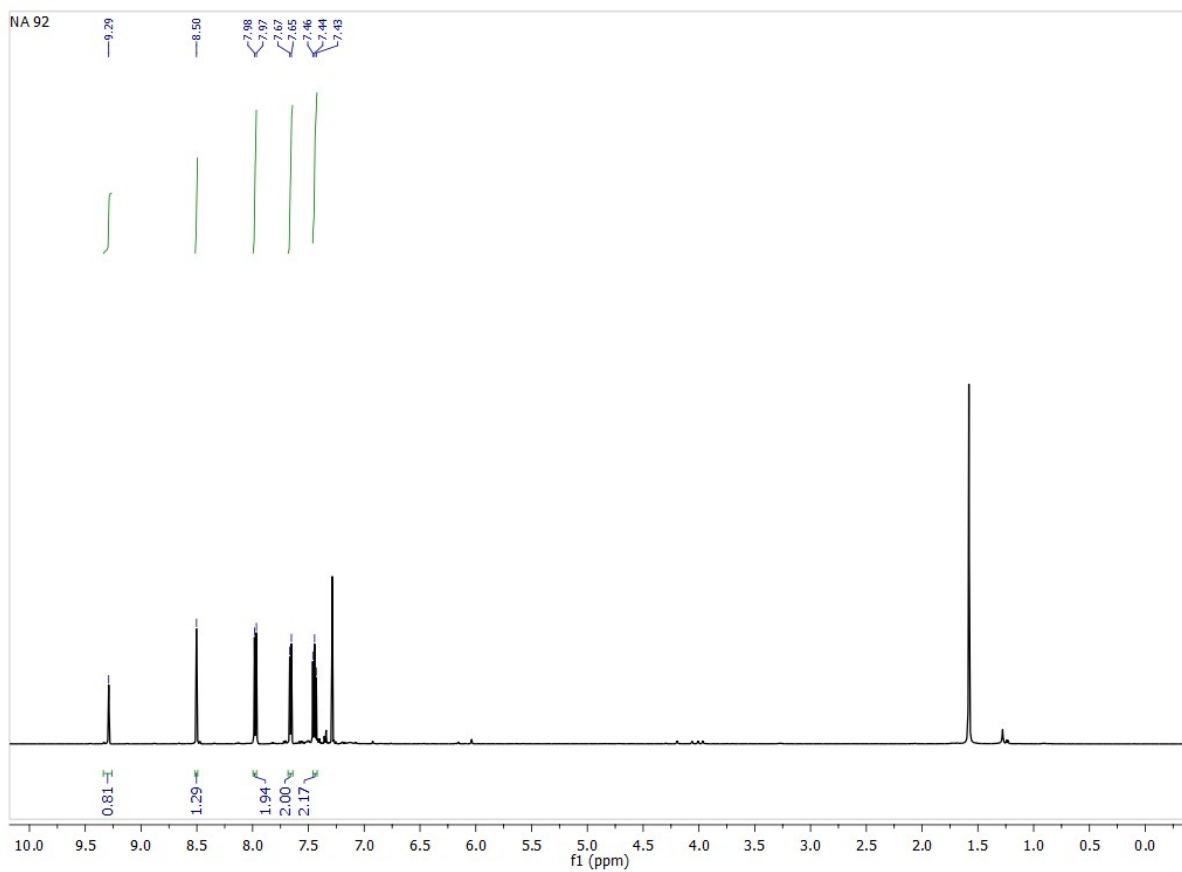

**Figure S1:**  $^1\text{H-NMR}$  of **7** in  $\text{CDCl}_3$ .

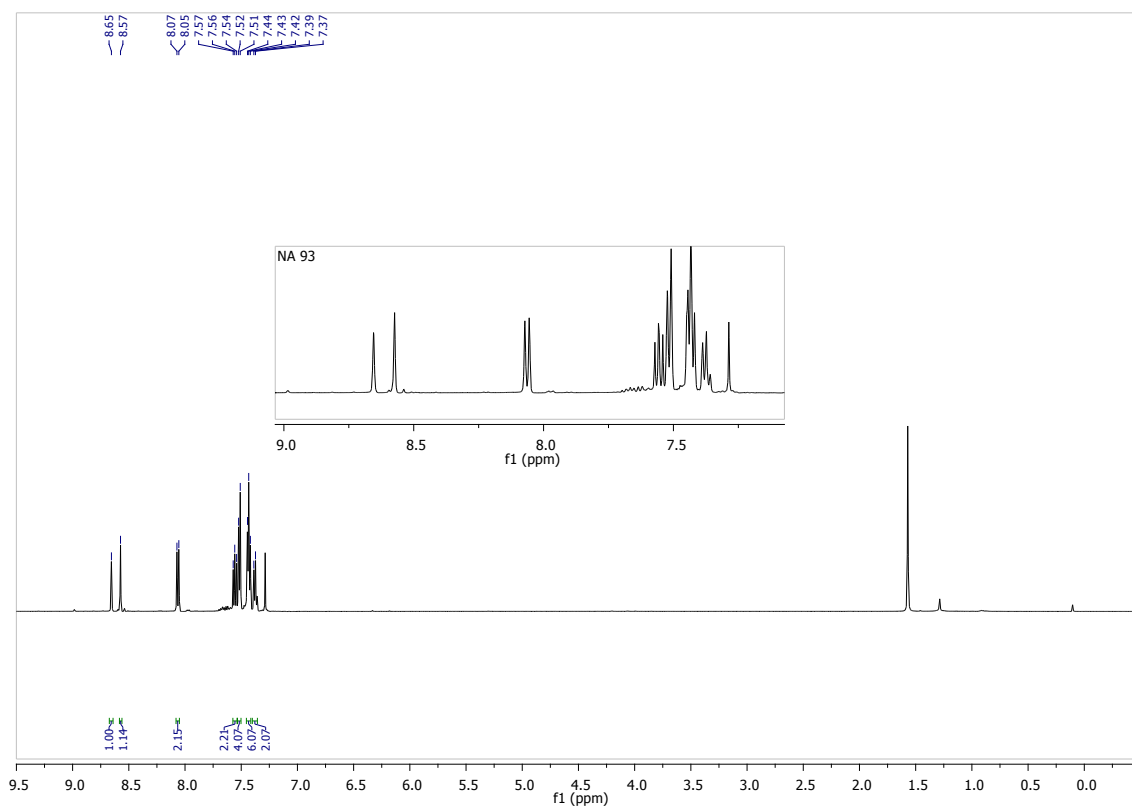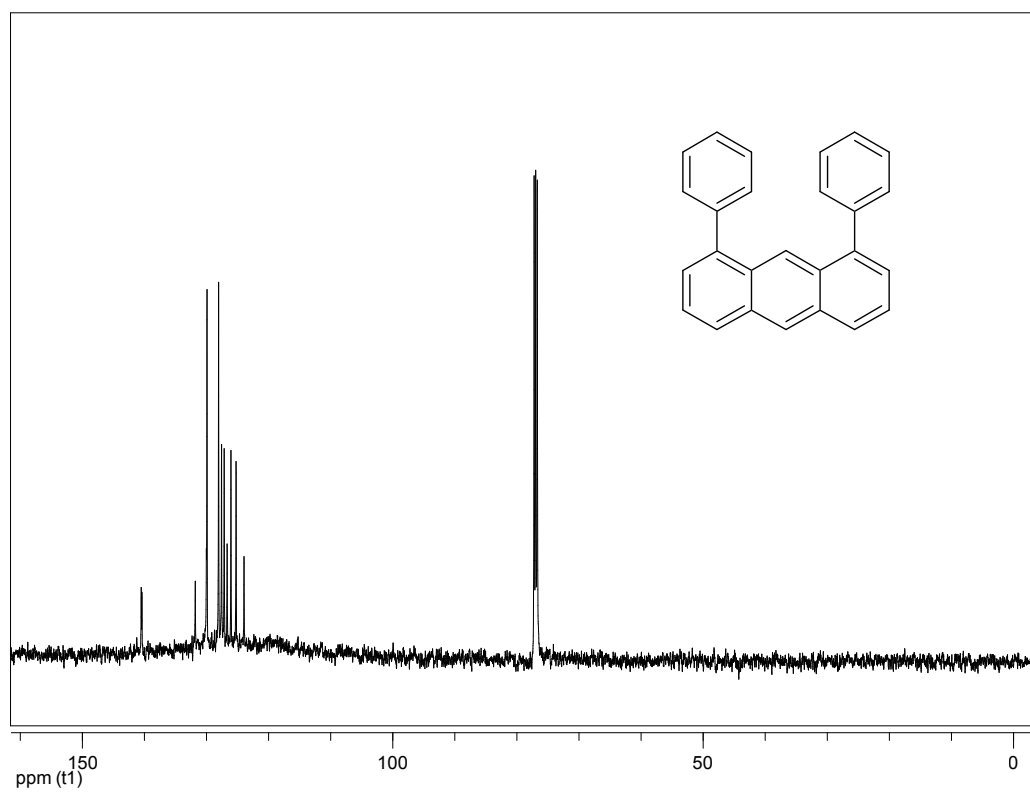

Figure S2:  $^1\text{H}$ -NMR (top) and  $^{13}\text{C}$ -NMR (bottom) of **1** in  $\text{CDCl}_3$ .

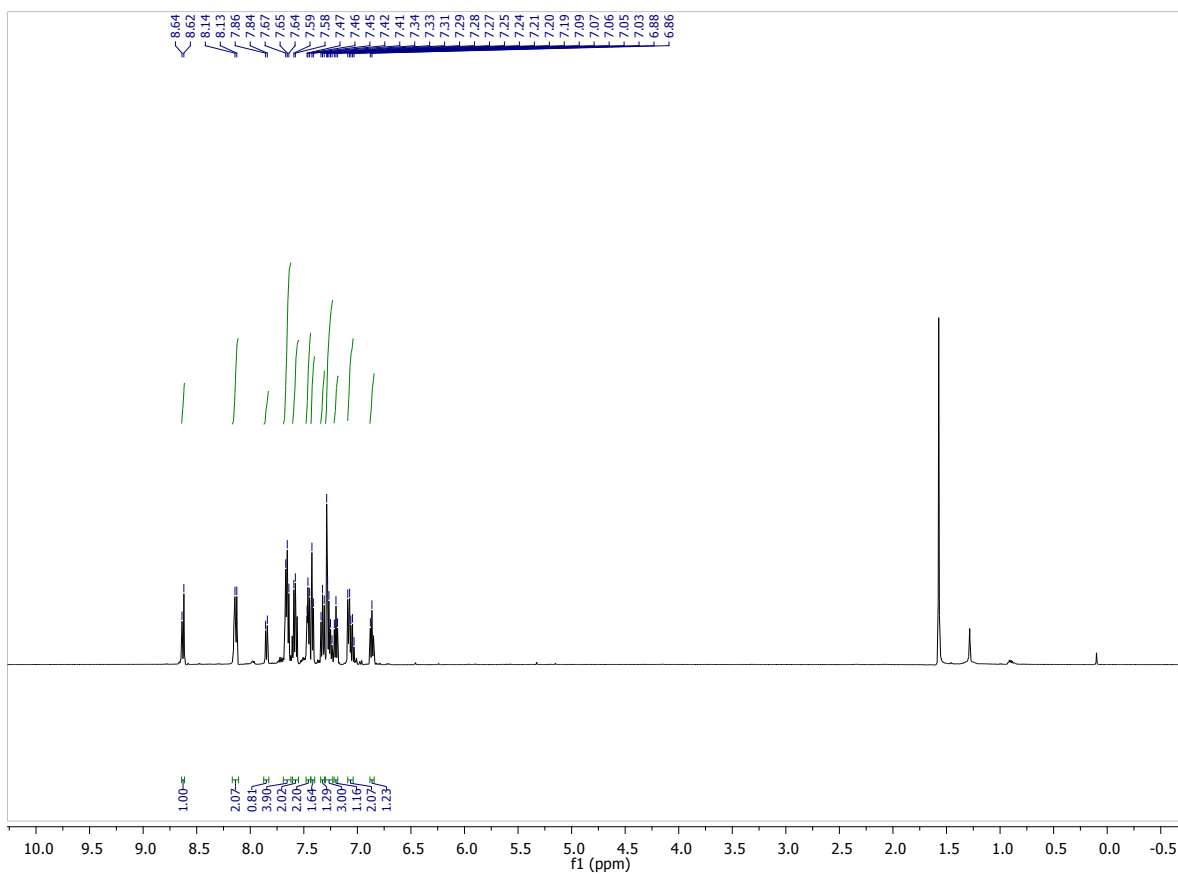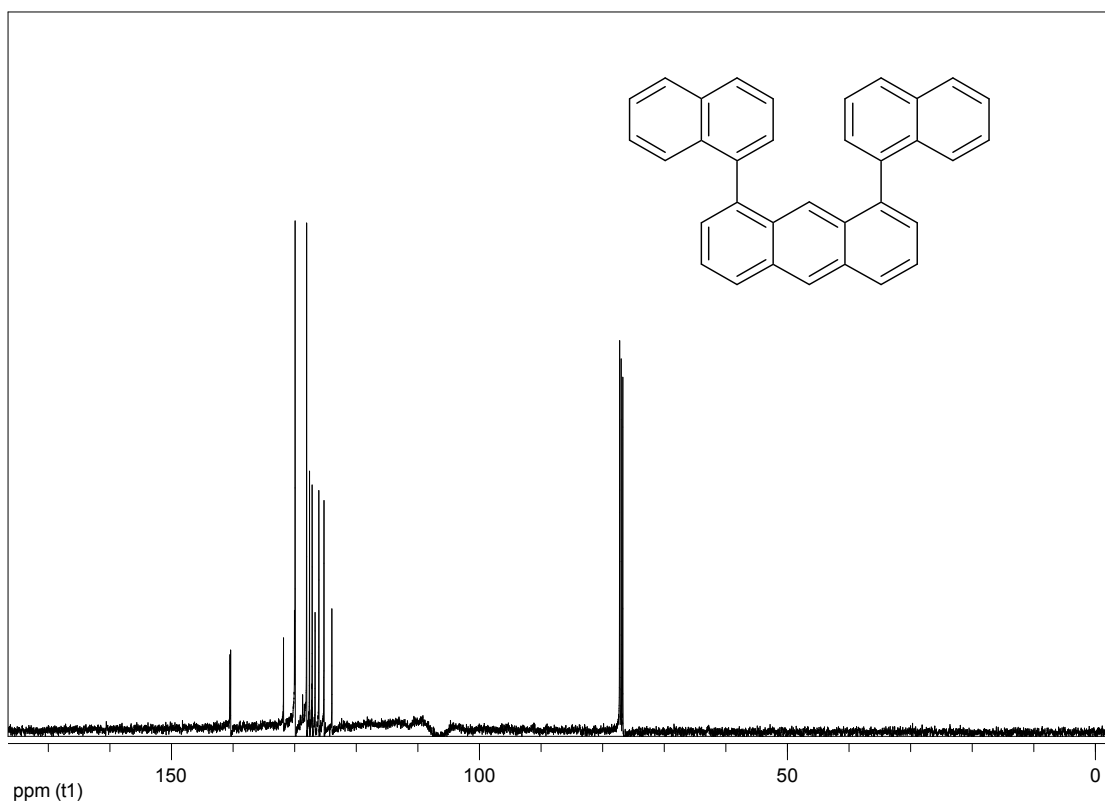

**Figure S3:**  $^1\text{H}$ -NMR (top) and  $^{13}\text{C}$ -NMR (bottom) of **2** in  $\text{CDCl}_3$ .

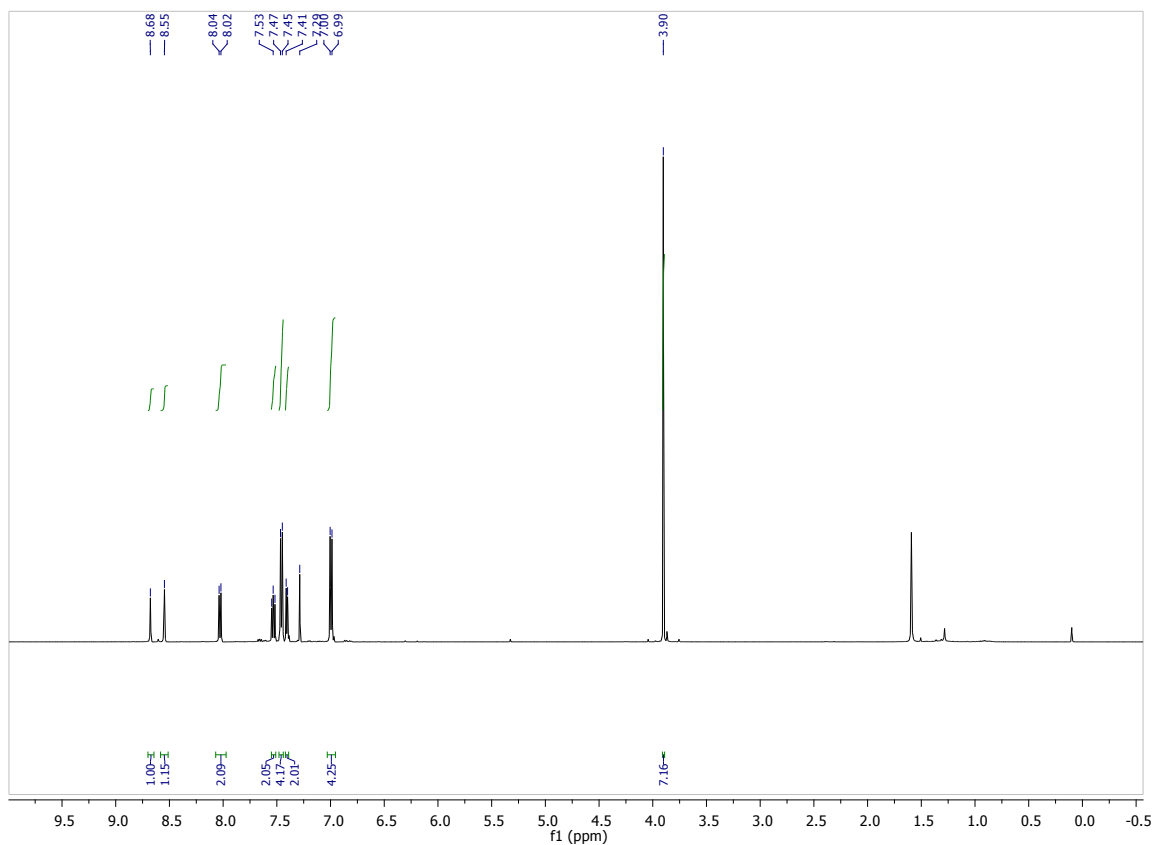

Figure S4:  $^1\text{H-NMR}$  of **3** in  $\text{CDCl}_3$ .

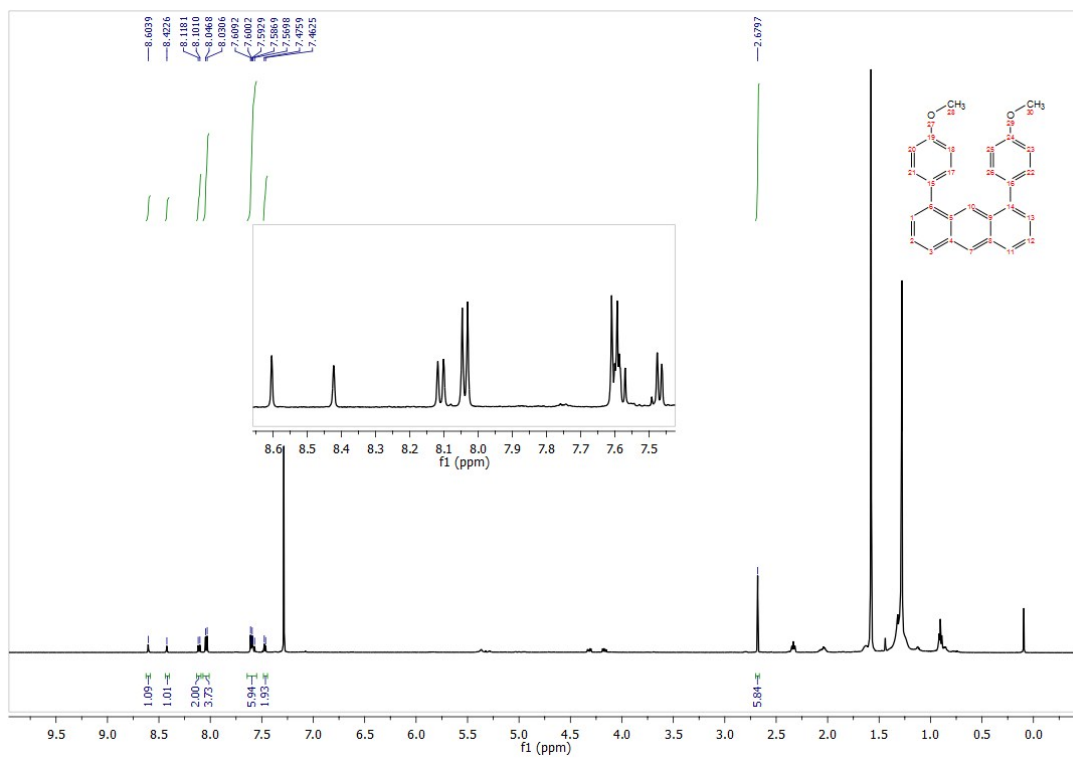

Figure S5:  $^1\text{H-NMR}$  of **4** in  $\text{CDCl}_3$ .

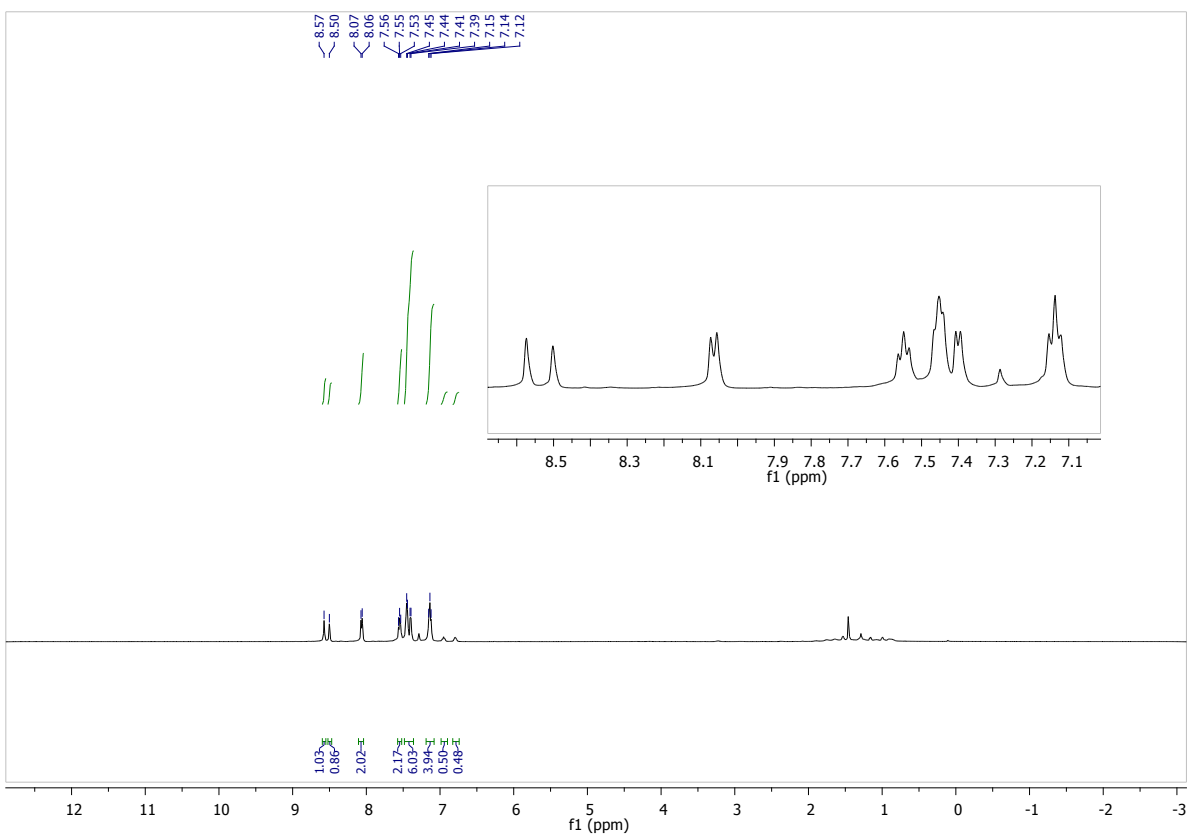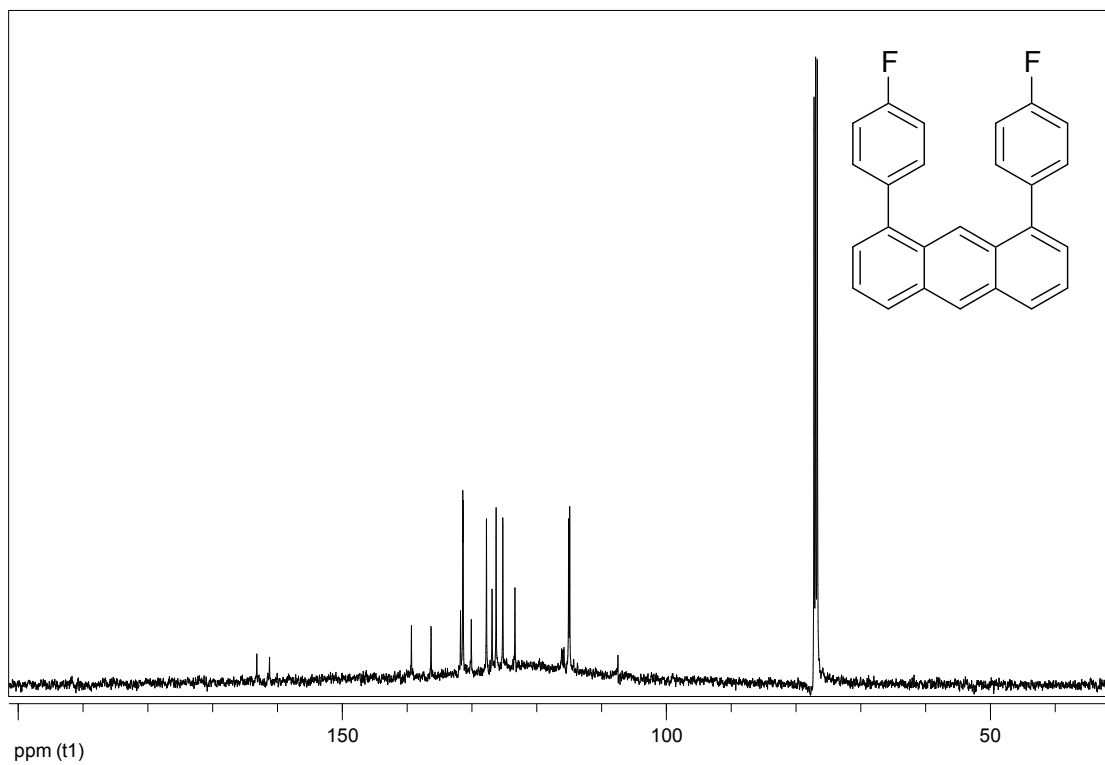

**Figure S6:**  $^1\text{H}$ -NMR (top) and  $^{13}\text{C}$ -NMR (bottom) of **5** in  $\text{CDCl}_3$ .

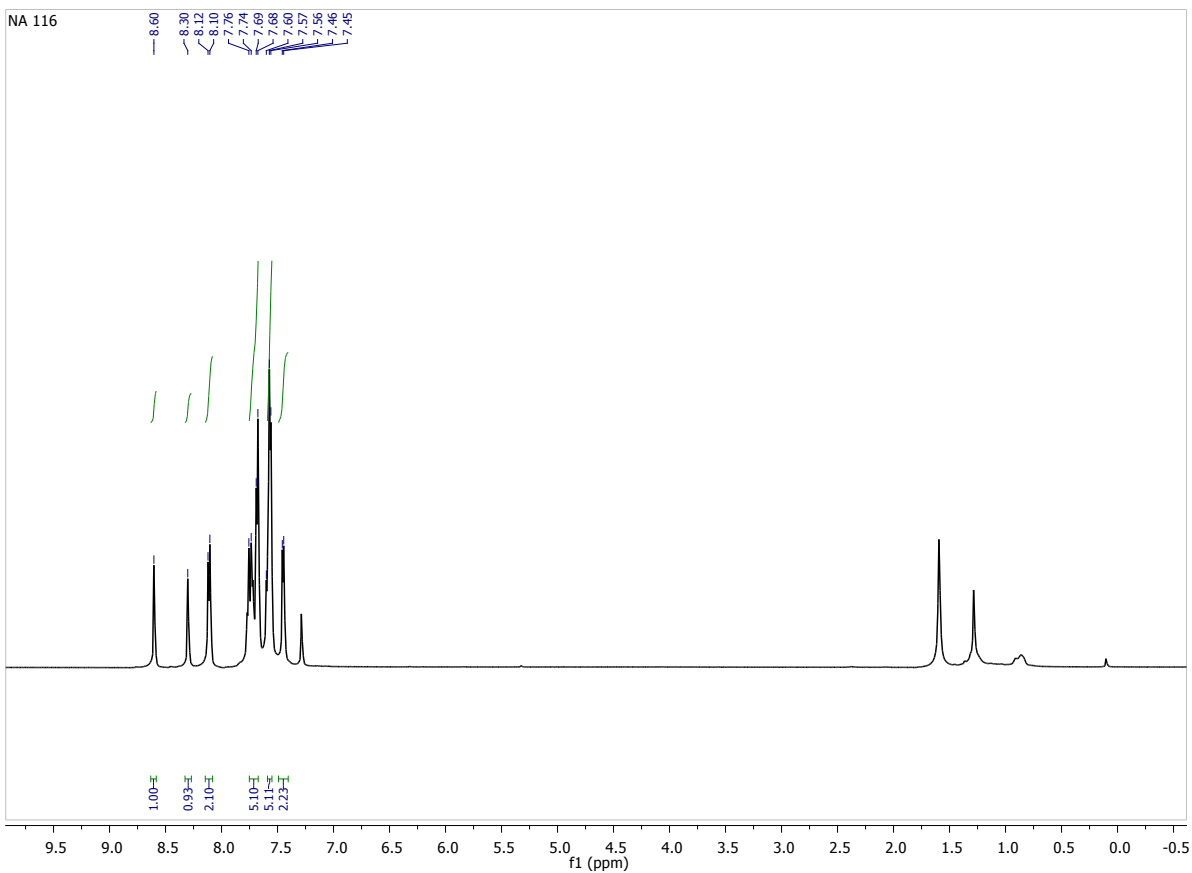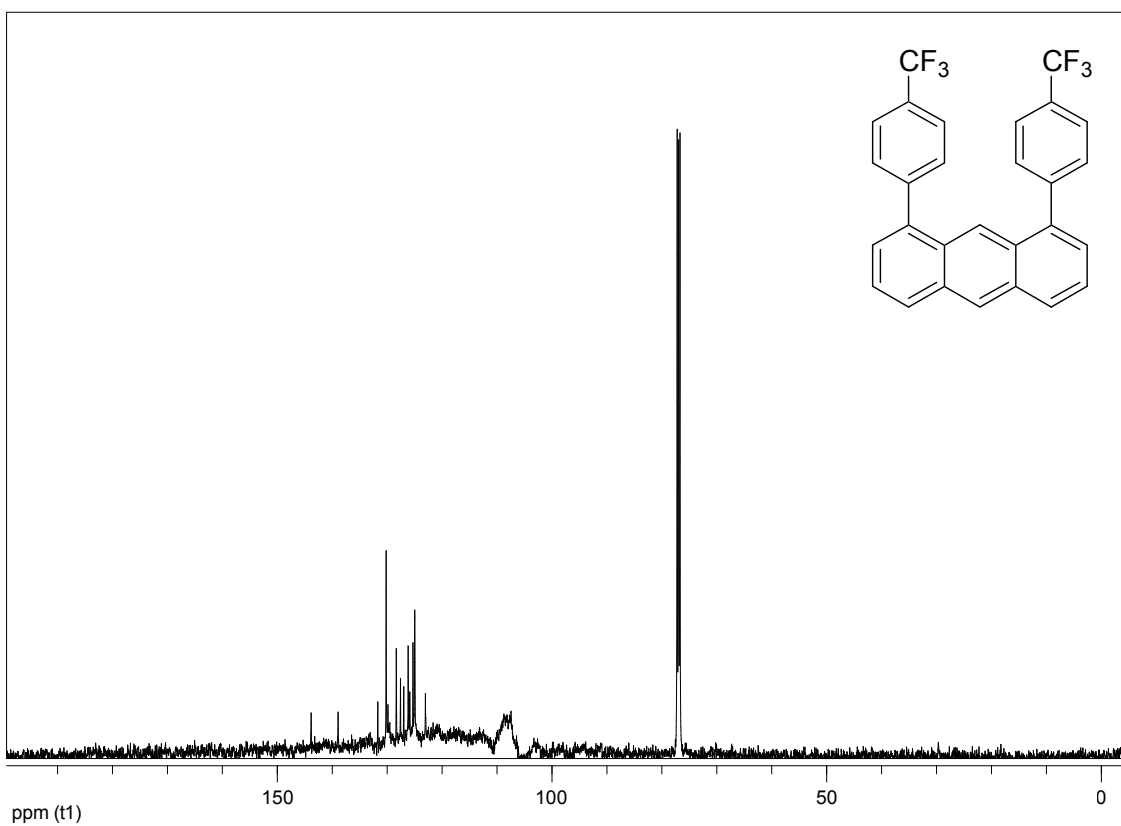

Figure S7:  $^1\text{H-NMR}$  (top) and  $^{13}\text{C-NMR}$  (bottom) of **6** in  $\text{CDCl}_3$ .

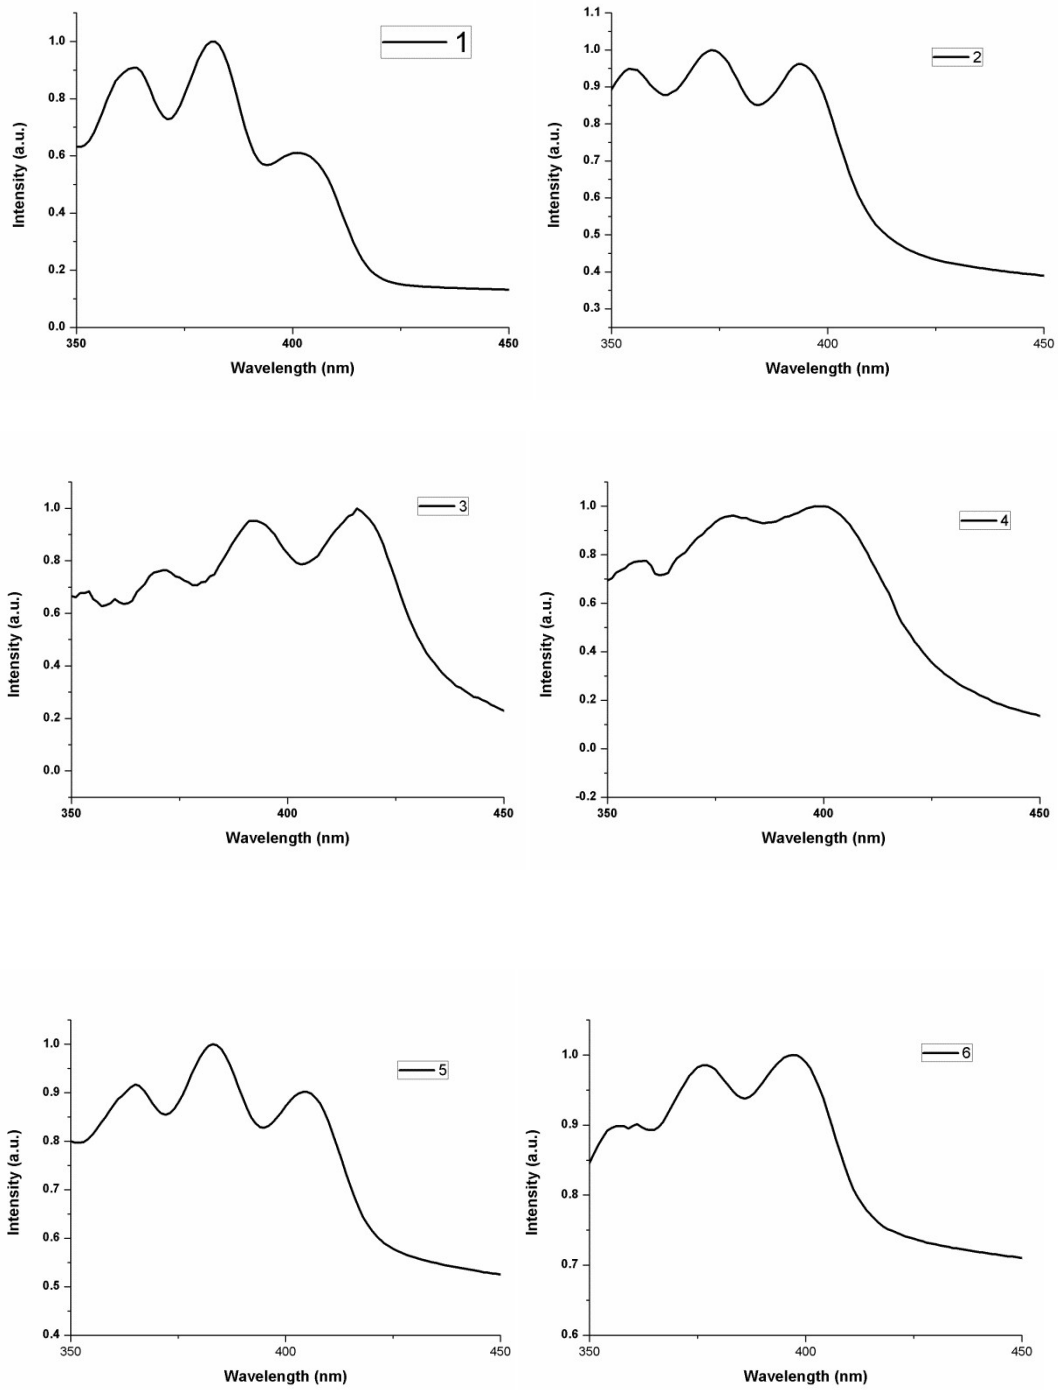

**Figure SI 8: Absorption spectra of drop casted thin films of 1-6**



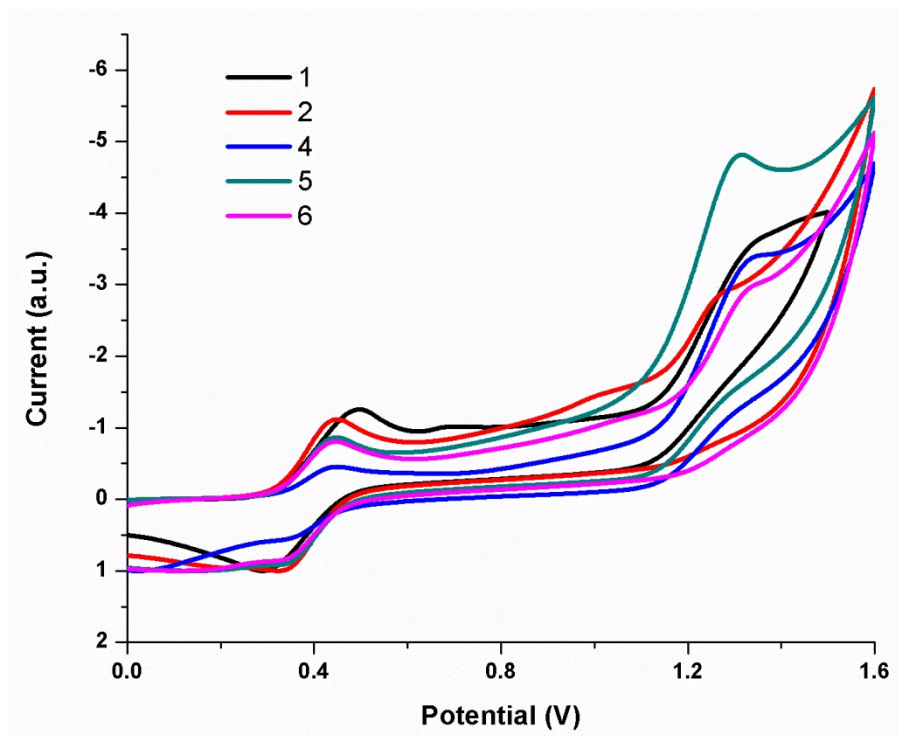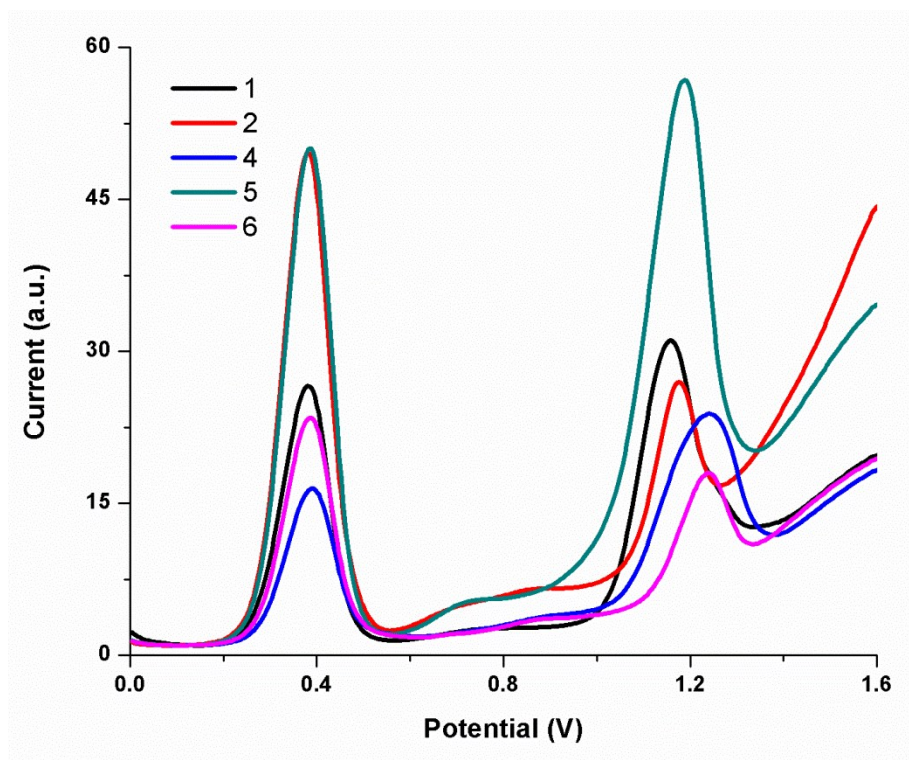

**Figure SI 9:** Cyclic voltammograms and Differential pulse voltammograms of 1-6 (except 3) in acetonitrile.

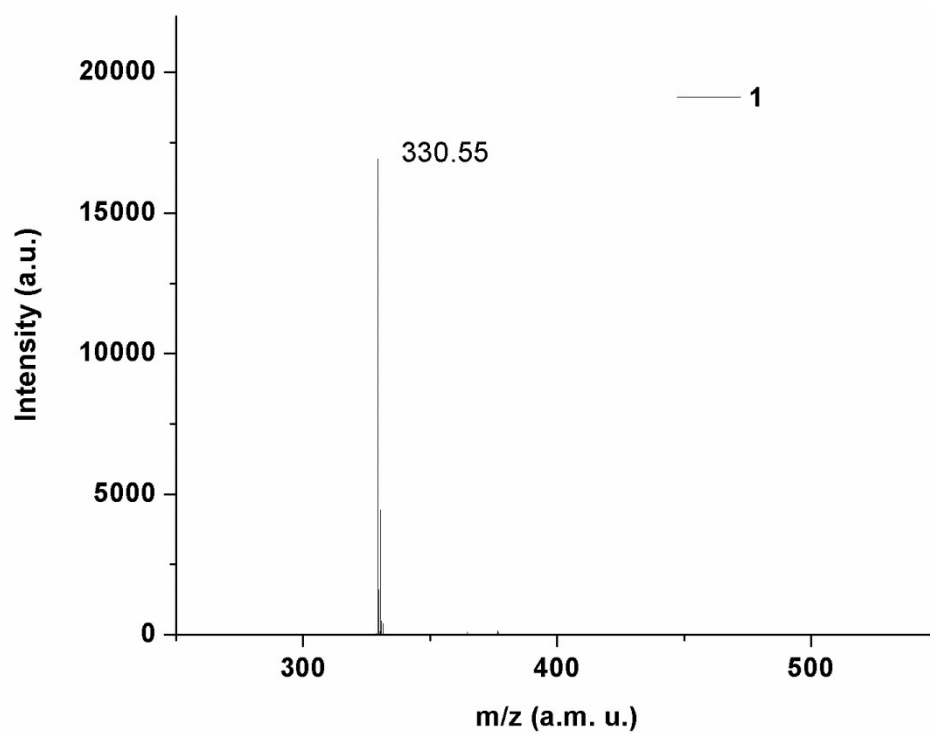

Figure S 10: MALDI-TOF mass spectrum of compound 1

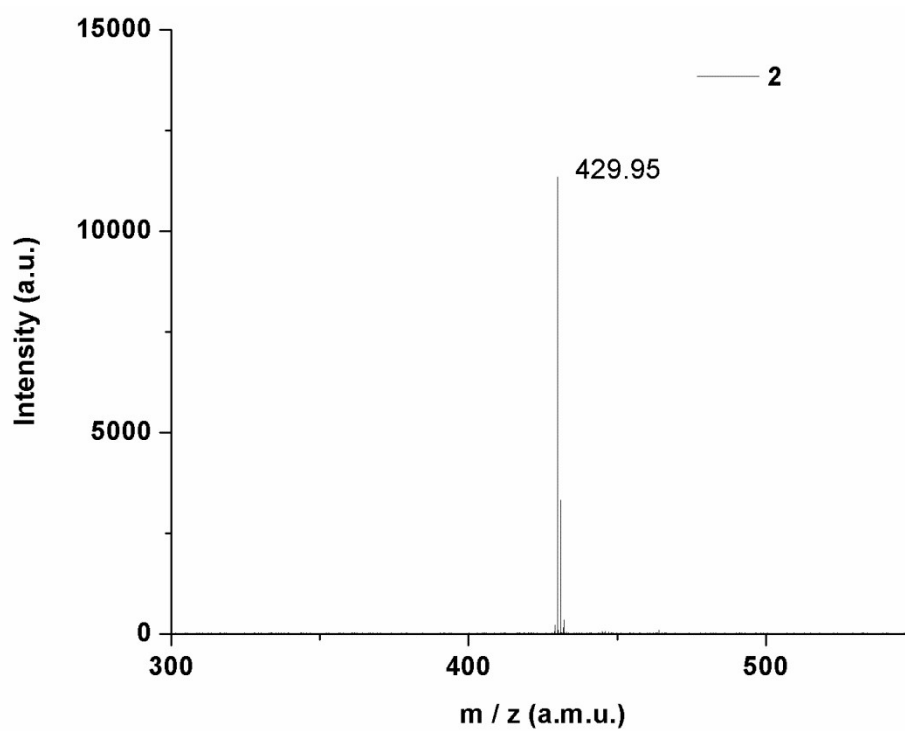

Figure SI 11: MALDI-TOF mass spectrum of compound 2

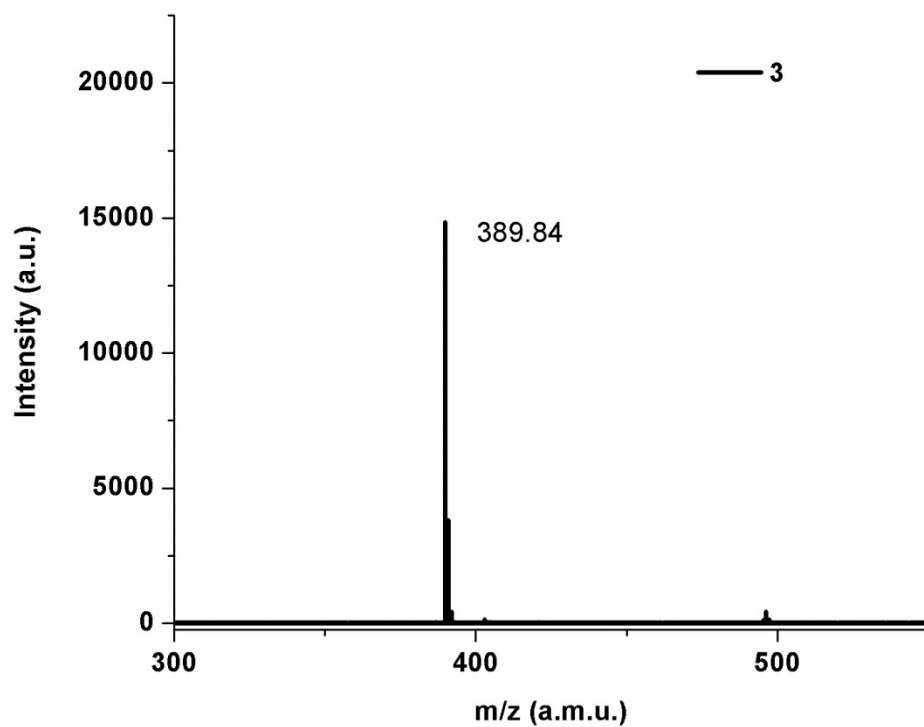

Figure SI 12: MALDI-TOF mass spectrum of compound 3

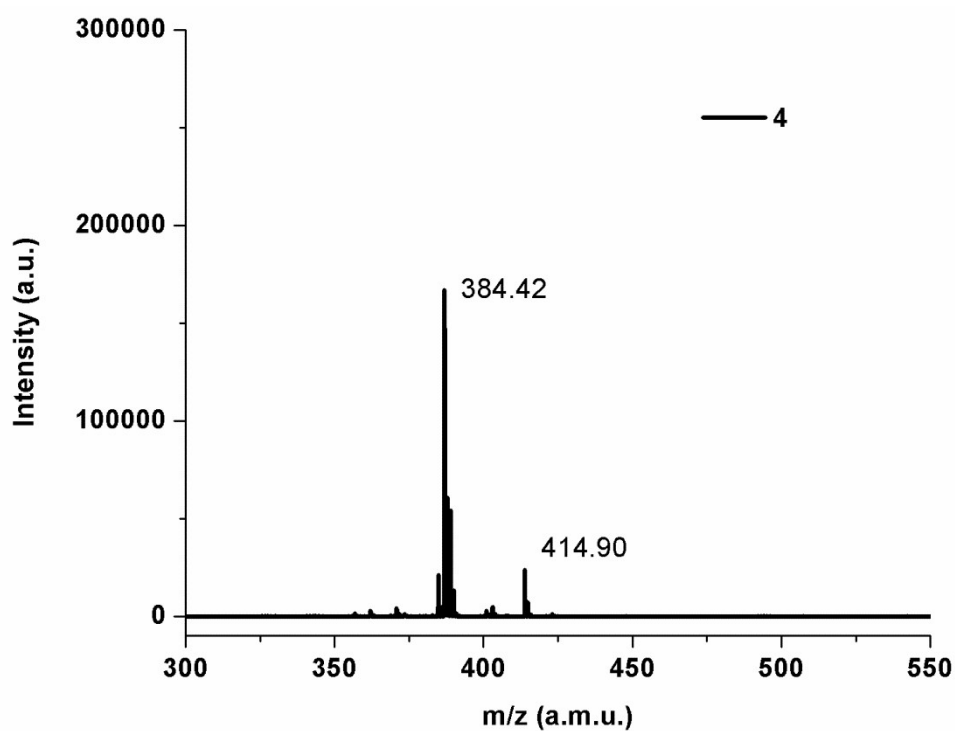

Figure SI 13: MALDI-TOF mass spectrum of compound 4

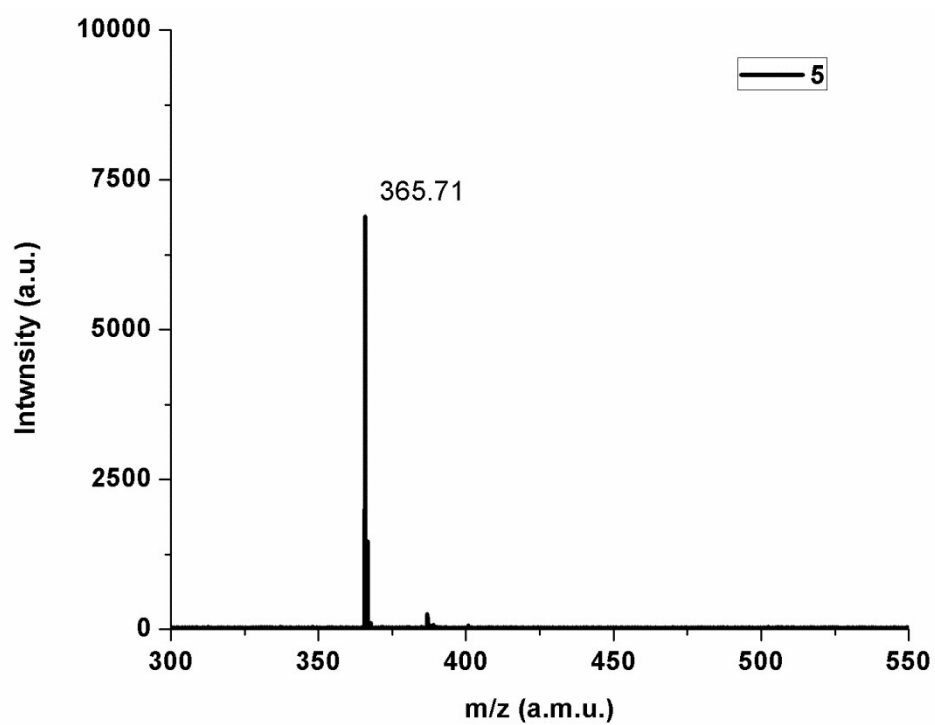

Figure SI 14: MALDI-TOF mass spectrum of compound 5

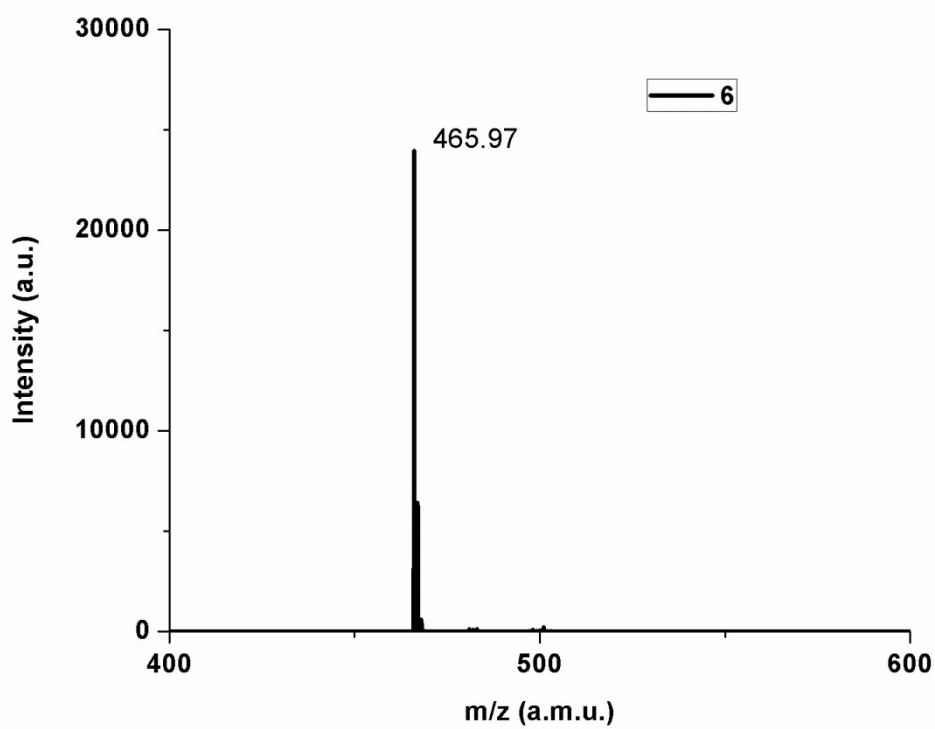

Figure SI 15: MALDI-TOF mass spectrum of compound 6

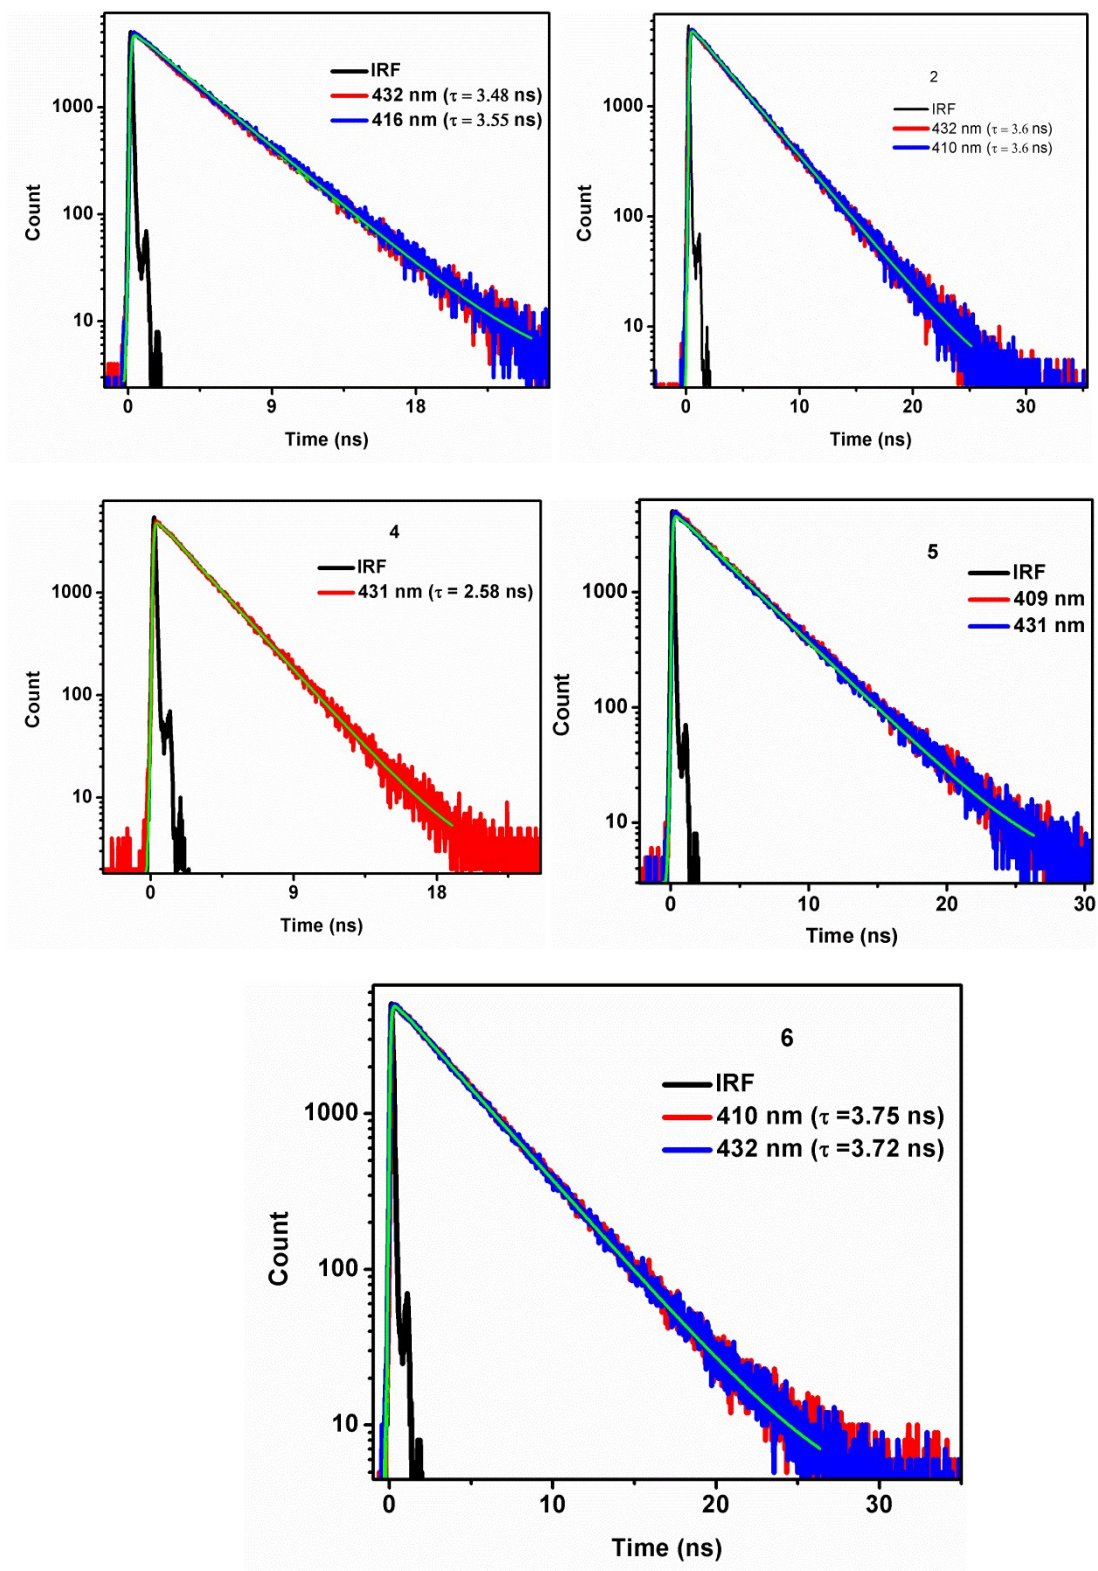

**Figure SI 16:** Fluorescence decay spectra of 1-6 (except for 3).

**Table SI 1.** The optimized geometries (Cartesian coordinates in Å) and energies (a.u.) of dimers of **1** and **5** computed at the B3LYP/6-311G\*\* level of theory. (Eg = Total electronic energy, THc = Thermal correction to Gibbs Free energy computed at the B3LYP level).

| <b>1</b>                     |              |             |             | <b>5</b>                     |              |             |             |
|------------------------------|--------------|-------------|-------------|------------------------------|--------------|-------------|-------------|
| Eg = -2003.7349977 NIMAG = 0 |              |             |             | Eg = -2400.7984208 NIMAG = 0 |              |             |             |
| THc = 0.623704               |              |             |             | THc = 0.590949               |              |             |             |
| C                            | 9.02169600   | -2.69098900 | 0.16454000  | C                            | 8.74021100   | -2.97641300 | -0.62642700 |
| C                            | 9.34829000   | -1.36593500 | 0.16344800  | C                            | 9.15753700   | -1.68432500 | -0.76375200 |
| C                            | 8.33035200   | -0.36910500 | 0.08365500  | C                            | 8.25265600   | -0.60330900 | -0.54279700 |
| C                            | 6.94695000   | -0.77226000 | -0.00461200 | C                            | 6.88469000   | -0.88624100 | -0.17851200 |
| C                            | 6.63905000   | -2.18389700 | -0.03727700 | C                            | 6.46827400   | -2.26591300 | -0.07220100 |
| C                            | 7.66397400   | -3.09539800 | 0.06181800  | C                            | 7.39220300   | -3.26246300 | -0.28168000 |
| C                            | 8.64006600   | 0.99310200  | 0.09426300  | C                            | 8.66066500   | 0.72735900  | -0.66535500 |
| C                            | 5.95931900   | 0.22145300  | -0.02241000 | C                            | 6.02656500   | 0.18877100  | 0.08717000  |
| C                            | 6.26538000   | 1.58821900  | 0.01922800  | C                            | 6.44043400   | 1.52378500  | -0.00794600 |
| C                            | 7.65419300   | 1.98210800  | 0.05087400  | C                            | 7.79580700   | 1.79758500  | -0.42286900 |
| C                            | 7.99087300   | 3.36862400  | 0.03332200  | C                            | 8.22032400   | 3.15065800  | -0.58160900 |
| H                            | 9.03828700   | 3.65008000  | 0.05851300  | H                            | 9.24158900   | 3.34250900  | -0.89315200 |
| C                            | 7.01246300   | 4.31859700  | -0.01819100 | C                            | 7.35469000   | 4.18002700  | -0.35010800 |
| C                            | 5.64390900   | 3.93919600  | -0.03204200 | C                            | 6.02453700   | 3.91829900  | 0.07433500  |
| C                            | 5.25384400   | 2.62061800  | -0.00012000 | C                            | 5.56004300   | 2.63764800  | 0.26120500  |
| H                            | 9.68246900   | 1.29374100  | 0.13910000  | H                            | 9.68482600   | 0.93695200  | -0.95879000 |
| H                            | 9.79581600   | -3.44737700 | 0.22881400  | H                            | 9.42943600   | -3.79669600 | -0.79231800 |
| H                            | 10.38357700  | -1.04823800 | 0.22777900  | H                            | 10.18209500  | -1.45720400 | -1.03861400 |
| H                            | 7.43091600   | -4.15378000 | 0.03179100  | H                            | 7.07629500   | -4.29700600 | -0.20743800 |
| H                            | 4.92275100   | -0.07905000 | -0.07009300 | H                            | 5.00643100   | -0.01937900 | 0.37495900  |
| H                            | 7.26990600   | 5.37170100  | -0.03390400 | H                            | 7.67780100   | 5.20747800  | -0.47408700 |
| H                            | 4.88378300   | 4.71221700  | -0.03929700 | H                            | 5.36475800   | 4.75312100  | 0.28235800  |
| C                            | 3.79850600   | 2.29978700  | 0.01589900  | C                            | 4.16061800   | 2.43519800  | 0.73281200  |
| C                            | 2.96038600   | 2.77145400  | -1.00357900 | C                            | 3.08423400   | 2.94423800  | -0.00581000 |
| C                            | 3.22272700   | 1.57058100  | 1.06644400  | C                            | 3.88572700   | 1.77912100  | 1.94143400  |
| C                            | 1.59039500   | 2.52117200  | -0.97616400 | C                            | 1.77053300   | 2.80671800  | 0.43634100  |
| H                            | 3.39252100   | 3.32738400  | -1.82822300 | H                            | 3.27692200   | 3.44571300  | -0.94711900 |
| C                            | 1.85356000   | 1.32177300  | 1.09435800  | C                            | 2.58018900   | 1.63380300  | 2.40008900  |
| H                            | 3.85133800   | 1.21212700  | 1.87350200  | H                            | 4.70298000   | 1.39050400  | 2.53746900  |
| C                            | 1.03097600   | 1.79435500  | 0.07255900  | C                            | 1.54658800   | 2.15155300  | 1.63549600  |
| H                            | 0.95990000   | 2.89023400  | -1.77770800 | H                            | 0.93555500   | 3.19249500  | -0.13473400 |
| H                            | 1.42641800   | 0.76142700  | 1.91855200  | H                            | 2.35811900   | 1.13517300  | 3.33525800  |
| C                            | 5.24157100   | -2.68296100 | -0.17937800 | C                            | 5.06468700   | -2.63813300 | 0.26419100  |
| C                            | 4.69002000   | -3.52723700 | 0.79359400  | C                            | 4.79300800   | -3.41630800 | 1.39718100  |
| C                            | 4.46809200   | -2.37098800 | -1.30659600 | C                            | 3.99204800   | -2.26665100 | -0.55940700 |
| C                            | 3.40521600   | -4.04452000 | 0.64580300  | C                            | 3.49421500   | -3.81270800 | 1.70591800  |
| H                            | 5.27271000   | -3.76873100 | 1.67559200  | H                            | 5.60755700   | -3.70562500 | 2.05099400  |
| C                            | 3.18538900   | -2.89042300 | -1.45588700 | C                            | 2.68769600   | -2.65551000 | -0.26850600 |
| H                            | 4.88340800   | -1.73212700 | -2.07762700 | H                            | 4.18056700   | -1.67766700 | -1.44922600 |
| C                            | 2.64807400   | -3.72859400 | -0.47995200 | C                            | 2.46613700   | -3.42300600 | 0.86402100  |
| H                            | 2.99590100   | -4.69389700 | 1.41191400  | H                            | 3.27417700   | -4.40954400 | 2.58231500  |
| H                            | 2.60646800   | -2.64566800 | -2.33946700 | H                            | 1.85764600   | -2.37862100 | -0.90617100 |
| C                            | -7.01246000  | -4.31862000 | 0.01853400  | F                            | 0.27243400   | 2.00820800  | 2.08243100  |
| C                            | -7.99087100  | -3.36865200 | -0.03306100 | F                            | 1.19890300   | -3.80958100 | 1.16258800  |
| C                            | -7.65419100  | -1.98213600 | -0.05071700 | C                            | -7.35473300  | -4.18002800 | 0.34998800  |
| C                            | -6.26538000  | -1.58824500 | -0.01907600 | C                            | -8.22037700  | -3.15065700 | 0.58144300  |
| C                            | -5.25384600  | -2.62063700 | 0.00038400  | C                            | -7.79585100  | -1.79758500 | 0.42271800  |
| C                            | -5.64390800  | -3.93921500 | 0.03238000  | C                            | -6.44046200  | -1.52378900 | 0.00784300  |
| C                            | -8.64006000  | -0.99313200 | -0.09420900 | C                            | -5.56006300  | -2.63765700 | -0.26127400 |
| C                            | -5.95931000  | -0.22147800 | 0.02241300  | C                            | -6.02456200  | -3.91830600 | -0.07440100 |
| C                            | -6.94693900  | 0.77223700  | 0.00450400  | C                            | -8.66071600  | -0.72735700 | 0.66517000  |
| C                            | -8.33034300  | 0.36907500  | -0.08372600 | C                            | -6.02658300  | -0.18877400 | -0.08723200 |
| C                            | -9.34828000  | 1.36589700  | -0.16362300 | C                            | -6.88470900  | 0.88624200  | 0.17843600  |
| H                            | -10.38356600 | 1.04819300  | -0.22792800 | C                            | -8.25269700  | 0.60331100  | 0.54264100  |
| C                            | -9.02168700  | 2.69095000  | -0.16484000 | C                            | -9.15758700  | 1.68432800  | 0.76355500  |
| C                            | -7.66396400  | 3.09537000  | -0.06215800 | H                            | -10.18216100 | 1.45720600  | 1.03835800  |

|   |             |             |             |   |             |             |             |
|---|-------------|-------------|-------------|---|-------------|-------------|-------------|
| C | -6.63904000 | 2.18387900  | 0.03702500  | C | -8.74025400 | 2.97641600  | 0.62625500  |
| H | -9.68246400 | -1.29377400 | -0.13903300 | C | -7.39222600 | 3.26246700  | 0.28158900  |
| H | -7.26990100 | -5.37172300 | 0.03431800  | C | -6.46828100 | 2.26591900  | 0.07217000  |
| H | -9.03828500 | -3.65010900 | -0.05825300 | H | -9.68489100 | -0.93694800 | 0.95855700  |
| H | -4.88377900 | -4.71223200 | 0.03970900  | H | -7.67785000 | -5.20747800 | 0.47396300  |
| H | -4.92273800 | 0.07902200  | 0.07005900  | H | -9.24165300 | -3.34250500 | 0.89294800  |
| H | -9.79580700 | 3.44733100  | -0.22918400 | H | -5.36477700 | -4.75313100 | -0.28239200 |
| H | -7.43090600 | 4.15375400  | -0.03223500 | H | -5.00643800 | 0.01937400  | -0.37497100 |
| C | -3.79851200 | -2.29979000 | -0.01562100 | H | -9.42948700 | 3.79669900  | 0.79210700  |
| C | -3.22274100 | -1.57055700 | -1.06615100 | H | -7.07631400 | 4.29701100  | 0.20737200  |
| C | -2.96039700 | -2.77143800 | 1.00386900  | C | -4.16061600 | -2.43522000 | -0.73282500 |
| C | -1.85357700 | -1.32173000 | -1.09405400 | C | -3.88567300 | -1.77922600 | -1.94148300 |
| H | -3.85135600 | -1.21209600 | -1.87320400 | C | -3.08426200 | -2.94420300 | 0.00587900  |
| C | -1.59040800 | -2.52114300 | 0.97646100  | C | -2.58011400 | -1.63391100 | -2.40007700 |
| H | -3.39253000 | -3.32738000 | 1.82850600  | H | -4.70290200 | -1.39066600 | -2.53758800 |
| C | -1.03099200 | -1.79431500 | -0.07225600 | C | -1.77054000 | -2.80667900 | -0.43620800 |
| H | -1.42643700 | -0.76136900 | -1.91823900 | H | -3.27699000 | -3.44561800 | 0.94721200  |
| H | -0.95991100 | -2.89020800 | 1.77800100  | C | -1.54654300 | -2.15158400 | -1.63539000 |
| C | -5.24156300 | 2.68296300  | 0.17908100  | H | -2.35800400 | -1.13533600 | -3.33526500 |
| C | -4.46811000 | 2.37116600  | 1.30636700  | H | -0.93558400 | -3.19239300 | 0.13494100  |
| C | -4.68999600 | 3.52709500  | -0.79400400 | C | -5.06467700 | 2.63815100  | -0.26413600 |
| C | -3.18541300 | 2.89062900  | 1.45560900  | C | -3.99208000 | 2.26666400  | 0.55951500  |
| H | -4.88344500 | 1.73242400  | 2.07748600  | C | -4.79294100 | 3.41636500  | -1.39708700 |
| C | -3.40519700 | 4.04440800  | -0.64626100 | C | -2.68771200 | 2.65551900  | 0.26868100  |
| H | -5.27266800 | 3.76845900  | -1.67604900 | H | -4.18064100 | 1.67766200  | 1.44931300  |
| C | -2.64808100 | 3.72865700  | 0.47955900  | C | -3.49413300 | 3.81276900  | -1.70575100 |
| H | -2.60651000 | 2.64601300  | 2.33923900  | H | -5.60745600 | 3.70569300  | -2.05093700 |
| H | -2.99586900 | 4.69367400  | -1.41245900 | C | -2.46609500 | 3.42303800  | -0.86381900 |
| H | -1.64843300 | 4.13112000  | 0.59733400  | H | -1.85769200 | 2.37860600  | 0.90637400  |
| H | -0.03457500 | 1.59733600  | 0.09426000  | H | -3.27405000 | 4.40962100  | -2.58212700 |
| H | 0.03455800  | -1.59728600 | -0.09394800 | F | -1.19884400 | 3.80960600  | -1.16231900 |
| H | 1.64842200  | -4.13103700 | -0.59776300 | F | -0.27236700 | -2.00823200 | -2.08226100 |
